# Supplementary material for: Deposition of zinc oxide as an electron transport layer in planar perovskite solar cells by spray and SILAR methods comparable with spin coating
Source: PubMed Central journal article supplement (PMC9065750; doi:10.1039/c9ra01839e), 2019-07-04
Supplement: RA-009-C9RA01839E-s001.pdf [file RA-009-C9RA01839E-s001.pdf]

## Synthesis of ZnO

Zinc acetate dihydrate (0.5 g) was dissolved in 20 ml of methanol under stirring at 60°C, and then solution of KOH (0.25 g of KOH in 10 ml of methanol) was prepared. KOH solution was slowly added to the zinc acetate solution at 60°C under vigorous stirring for two hours, which resulted in the formation of a white suspension. The white product was centrifuged and washed three times with absolute methanol. Finally, the obtained product was dried at room temperature.

In SILAR method, an ammonia solution (NH<sub>4</sub>(OH) 25%) was added slowly to a 0.1 M ZnSO<sub>4</sub> solution. This initially forms Zn(OH)<sub>2</sub> precipitate, but, in excess ammonia, it changes to tetraamminezinc complex [Zn(NH<sub>3</sub>)<sub>4</sub>]<sup>2+</sup> as follows:

(Eq. S1)

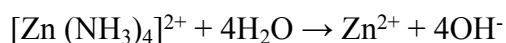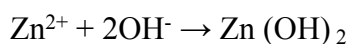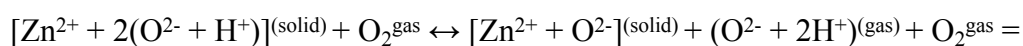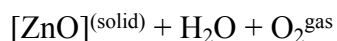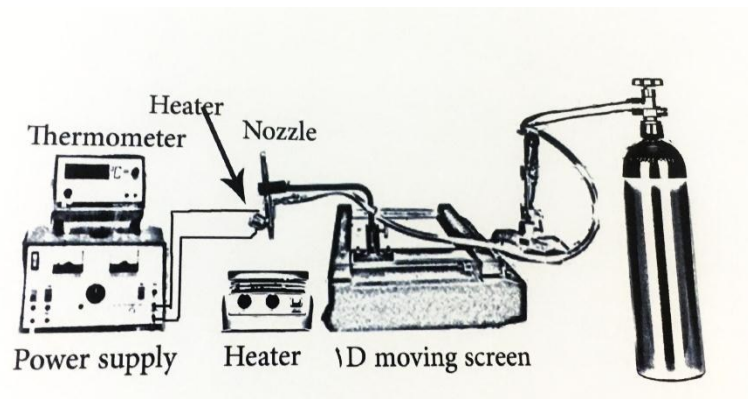

Fig S1. The design for spraying deposition of the ZnO layer

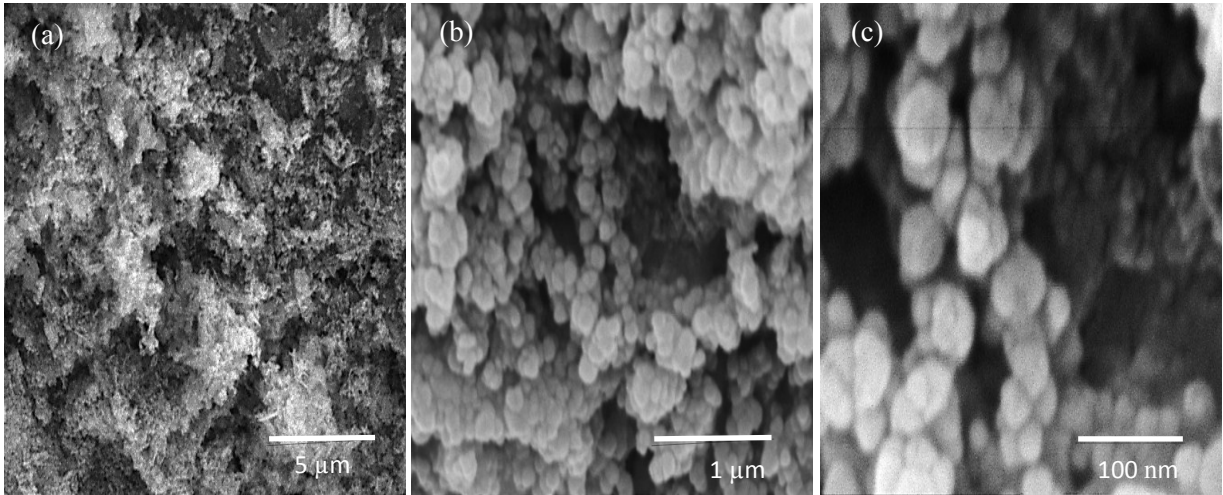

Fig. S2. SEM images of the ZnO synthesized on different magnification scales: (a) 5 μm, (b) 1 μm, and (c) 100 nm.

Tauc equation is given by:

$$(\alpha h\nu) = A (h\nu - E_g)^n \quad (\text{Eq. S2})$$

Where  $\alpha$  is the absorption coefficient,  $h\nu$  is the photon energy,  $A$  is the constant, and  $E_g$  is the bandgap of the sample. The value of  $n$  is  $\frac{1}{2}$  or  $2$  depending upon whether the transition from the valence band to the conduction band is direct or indirect. Here,  $n$  is  $\frac{1}{2}$  because of the direct band gap of ZnO.
